1 **Environmental change alters nitrogen fixation rates and microbial parameters in a**  
2 **subarctic biological soil crust**

3

4 Alejandro Salazar <sup>1</sup>, Denis Warshan <sup>2</sup>, Clara Vasquez-Mejia <sup>3</sup>, Ólafur S. Andrésón <sup>2</sup>

5

6 1. Faculty of Environmental and Forest Sciences, Agricultural University of Iceland.

7 2. Faculty of Life and Environmental Sciences, University of Iceland.

8 3. Faculty of Food Sciences and Nutrition, University of Iceland.

9

10 **Abstract**

11

12 Together, Biological Soil Crust (BSC) and other cryptogamic groundcovers can contribute  
13 up to half of the global nitrogen (N) fixation. BSC also stabilizes the soil (reducing erosion  
14 and dust emissions), fixes carbon (C), retains moisture, and acts as a hotspot of microbial  
15 diversity and activity. Much of the knowledge about how climate change is affecting the  
16 composition and functioning of BSC comes from hot arid and semiarid regions. The  
17 comparatively smaller body of research on BSC from cold and mesic environments has  
18 been primarily observational, for example along chronosequences after a glacier retreat.  
19 Few studies have experimentally investigated the effects of the environment on BSC from  
20 high latitudes. Such experiments allow unraveling of relationships at a resolution that can  
21 only be achieved by controlling for confounding factors. We measured short-term (2-4  
22 days) responses of a liverwort-based (*Anthelia juratzkana*) BSC from the south of Iceland  
23 to a range of temperature, moisture and light conditions. Warming increased N fixation

24 rates, especially when moisture was at a saturation level, and only when light was not  
25 limiting. A correlation analysis suggests that increases in N fixation rates were linked to  
26 cyanobacterial abundance on the BSC surface and to the rates of their metabolic activity.  
27 Warming and moisture changes also induced compositional and structural modification  
28 of the bacterial community, with consequences at the functional level. In contrast to many  
29 observations on BSC from hot drylands, the BSC from our cold and mesic study site is  
30 more limited by low temperature and light than by moisture. Our findings show possible  
31 ways in which BSC from cold and mesic ecosystems can respond to short-term  
32 manifestations of climate change, such as increasingly frequent heat waves.

33

34

35 **Keywords:** Biological Soil Crust (BSC), cyanobacteria, nitrogen (N) fixation, climate  
36 change, subarctic ecosystems, cyanobacterial abundance and composition.

37

## 38 1. Introduction

39

40 Biological Soil Crust (BSC) is a skin-like system generally dominated by  
41 cyanobacteria, fungi, lichens and bryophytes (Belnap, 2003; Bowker et al., 2018). In some  
42 areas this system can cover over 90% of the soil surface (Williams et al., 2017). BSC-  
43 forming organisms can colonize soils in harsh environments, such as drylands (Belnap,  
44 2003; Elbert et al., 2012; Rodríguez-Caballero et al., 2018) or newly exposed soil after a  
45 glacier retreat (Breen and Lévesque, 2008; Yoshitake et al., 2018). Once they establish,  
46 they stabilize the soil (Gao et al., 2017), increase moisture retention (Breen and

47 Lévesque, 2008), fix nitrogen (N) (Dickson 2000; Elbert et al., 2012) and carbon (C) (Yan-  
48 Gui et al., 2011; Elbert et al., 2012), and become hotspots of microbial abundance  
49 (Yoshitake et al., 2018) and diversity (Steven et al., 2013). Under constant high  
50 environmental stress, BSC becomes a permanent feature of the undisturbed ecosystem.  
51 When high abiotic stress decreases over time, BSC acts like a transient colonizer in  
52 primary succession (Bowker, 2007).

53 BSC covers 12% of the Earth's terrestrial surface (Rodríguez-Caballero et al.,  
54 2018). It is estimated that before the end of the century climate change and intensification  
55 of land use will decrease this area by 25-40%, thus enhancing emissions of soil dust and  
56 reducing BSC's contributions to the global C and N cycles (Rodríguez-Caballero et al.,  
57 2018).

58 The rates at which BSC influences N and C cycling depend on environmental  
59 factors such as temperature, moisture and light intensity, and on intrinsic properties of its  
60 biological components, such as the N fixing activity of cyanobacteria (Belnap, 2001) and  
61 the differential decomposing activity of bacteria and fungi (Zhao et al., 2020). Together,  
62 BSC and other cryptogamic ground covers (i.e. rock crust and bryophyte and lichen  
63 carpets) globally account for up to half of the terrestrial N fixation, and 7% of the C fixation  
64 (Elbert et al., 2012; Porada et al., 2014). Uncertainty in model projections remains high  
65 (global N fixation estimates ranging between 3.5 and 34 Tg yr<sup>-1</sup>; Porada et al., 2014), in  
66 part due to limited knowledge of the extent and structure of crusted communities in many  
67 ecosystems (Ferrenberg et al., 2017).

68 Cold-adapted BSC covers vast areas at high latitudes (Pushkareva et al., 2016),  
69 the part of the world experiencing the fastest warming (IPCC, 2021). One of the most

70 visual and consequential manifestations of climate change in these regions and globally  
71 is the increase in frequency and intensity of short-term climatic anomalies such as heat  
72 waves (Perkins et al., 2012). Some high-latitude systems are more resistant to climatic  
73 anomalies than others (Jónsdóttir et al., 2005). Because of its relative simplicity and the  
74 fast turnover rates of its biological components, BSC may be particularly sensitive to  
75 short-term changes in the environment.

76         The potential effects of climate change on cold-adapted BSC, and on the  
77 ecosystem services it provides, are still largely unknown. Most of the knowledge on BSC  
78 responses to the environment comes from hot arid or semiarid ecosystems (e.g. Eldridge  
79 et al., 2006; Bowker et al., 2008; Büdel et al., 2009; Delgado-Baquerizo et al., 2013; Zhao  
80 et al., 2020). The comparatively smaller body of research on BSC adapted to cold and  
81 mesic conditions has been primarily observational, for example along chronosequences  
82 after a glacier retreat (Breen and Lévesque, 2008; Yoshitake et al., 2010, 2018;  
83 Borchhardt et al., 2019) or along climatic gradients (Stewart et al., 2011; Blay et al., 2017;  
84 Pushkareva et al. 2021). While observational approaches are useful to study ecosystem  
85 processes under natural conditions, experiments allow study of relationships at a  
86 resolution that can only be achieved by controlling for confounding factors. Only a handful  
87 of studies have used an experimental approach to investigate the effects of the  
88 environment on cold-adapted BSC (e.g. Colesie et al., 2014; Alatalo et al., 2015; Rousk  
89 et al., 2018).

90         From a methodological perspective, experimental research on BSC offers many  
91 advantages (Bowker et al., 2014; Maestre et al., 2016). Because of its size, it is possible  
92 to collect entire BSC blocks and study them as closed systems, even under laboratory

93 conditions (Figure S1). Also, because of the small size and relatively fast turnover rates  
94 of BSC organisms, it can respond rapidly to external factors. This has advantages for  
95 early detection of environmental changes. Finally, since BSC can act as the first link in a  
96 chain of ecological succession (Godínez- Alvarez et al., 2011), understanding BSC  
97 responses to the environment not only provides information about the BSC itself, but also  
98 about the potential ecosystems and ecological dynamics that can evolve from it.

99         Here we conducted a laboratory experiment to study the compositional and  
100 functional responses of a cold- and mesic-adapted BSC to short-term (2-4 days)  
101 incubations at a range of temperature, moisture and light intensities. The ranges of  
102 temperature varied between average and maximum values during the snow-free season  
103 in an Icelandic ecosystem dominated by BSC. Unless limited by other biotic and/or abiotic  
104 factors, we expected warming to increase N fixation rates either via growth of N fixers, or  
105 via increases in their metabolic activity, or both. Also, we expected environmental  
106 treatments to exert a selective pressure, leading to structural and possibly compositional  
107 changes within the N fixing communities (e.g. favoring warm adapted taxa); and for this  
108 to contribute to explaining N fixation responses to the environment. Given the well known  
109 dependence of biological N fixation on moisture (Rousk et al., 2018), and the need of  
110 photosynthetically synthesized C to run the N fixing machinery (Scherer et al., 1988), we  
111 expected the effects of warming on N fixation to be directly dependent on moisture and  
112 light intensity. Also, we hypothesized a positive correlation between N fixing rates and  
113 chlorophyll *a* (Chl *a*) content - an indicator of net photosynthetic rate (Yan-Gui et al.,  
114 2011). Overall, we expected subarctic BSC to respond to short-term environmental  
115 manipulations and for these responses to indicate possible ways in which this system,

116 and the key ecosystem services it provides, could be altered by climate anomalies like  
117 increasingly frequent heat waves (Perkins et al., 2012).

118

## 119 **2. Materials and methods**

120 We designed a controlled laboratory experiment to investigate the responses of  
121 subarctic BSC from the south of Iceland to different levels of temperature, moisture and  
122 light. We studied how these environmental factors affect the capacity of subarctic BSC to  
123 fix N, and whether these responses were linked to changes in the abundance of N fixers  
124 and/or to structural changes in the BSC microbial communities.

125

### 126 **2.1. Sample collection**

127 In September 2018 we collected BSC from a site adjacent to the *Climate Research*  
128 *Unit at Subarctic Temperatures* (CRUST) experiment (Salazar et al., in progress), near  
129 Landmannahellir, Iceland (64°02' N, 19°13' W; 590 m.a.s.l.). Mean annual temperature  
130 and precipitation at the site are ca. 5 °C and 1500 mm, respectively. Surface cover in this  
131 area is primarily liverwort-based BSC (ca. 50%), followed by mosses (ca. 30%) and *Salix*  
132 *herbacea* dwarf willow (ca. 20%), on an andosol/vitrisol substratum.

133 We randomly collected eight BSC blocks (i.e. replicates) of 13x16 cm<sup>2</sup> and ca. 5  
134 cm deep (Figure S1a). Blocks were separated by at least 10 meters. Since the focus of  
135 this study is on BSC, patches of moss or vascular plants were avoided. We transported  
136 (approx. 5 h) the BSC blocks in coolers with ice packs and stored them in a dark room at  
137 5 °C for 2 to 5 weeks while we performed the analyses described below. We kept wet  
138 paper towels inside the coolers to prevent desiccation.

139

## 140 **2.2. Experimental design and environmental treatments**

141 We studied the effects of temperature, moisture and light on N fixation and the  
142 microbial community structure. For this, we conducted a factorial experiment (4 x 2 x 2)  
143 with four levels of temperature: 10, 15, 20 and 25 °C; two levels of moisture: ca. 75%  
144 (close to moisture at the moment of sampling) and 100% (saturated); and two levels of  
145 light ca. 2  $\mu\text{mol m}^{-2} \text{s}^{-1}$  (low intensity) and ca. 90  $\mu\text{mol m}^{-2} \text{s}^{-1}$  (high intensity; Figure S2).  
146 Light was available all the time (i.e. we did not set day/night cycles), to simulate conditions  
147 in the sampling site during the summer. Temperature and light treatments were set in a  
148 growth chamber (Termaks series 8000, Bergen, Norway), and monitored hourly with  
149 temperature/light loggers (HOBO Pendant® MX Temperature/Light Data Logger,  
150 MX2202, Onset, Bourne, MA, USA). Levels of these environmental variables were  
151 selected within ranges commonly experienced by BSC at the sampling site (unpublished  
152 observations) and comparable ecosystems (Rousk et al., 2018).

153 Average temperature and light intensity inside the jars were  $11.1 \pm 0.7$ ,  $16.5 \pm 0.7$ ,  
154  $21.5 \pm 0.7$  and  $26.6 \pm 0.9$  °C (2 loggers x 2 light levels; n = 4) and  $2.3 \pm 0.04$  and  $88.0 \pm$   
155  $1.6 \mu\text{mol m}^{-2} \text{s}^{-1}$  (2 loggers x 4 temperature levels; n = 8) respectively (Figure S2a and b).  
156 Temperature levels inside the jars were slightly higher than temperatures set in the  
157 growing chamber due to a greenhouse effect.

158 To create a saturation level in the moisture treatment, we wetted each sample with  
159 an excess of deionized water and waited for approximately one minute until it stopped  
160 dripping. Moisture was maintained between analyses by placing wet towels in the coolers  
161 stored in the cold, dark room. After environmental treatments and N fixation

162 measurements (see following section), we oven dried (60 °C, 24 h) BSC disks to estimate  
163 the dried weight of the samples, and to prepare them for chlorophyll *a* analysis and DNA  
164 extraction. Average moisture content was  $75.5 \pm 2.4$  and  $107.2 \pm 2.3$  % (Figure S3c).

165

### 166 **2.3. N fixation under controlled temperature, moisture and light conditions**

167 We estimated N fixation rates with the Acetylene Reduction Assay (ARA; Hardy  
168 et al., 1968). We subsampled disks of 5 cm diameter and 1.5 cm depth (Figure S1c) out  
169 of the 13x16x5 cm<sup>3</sup> BSC blocks (Figure S1a). We used eight 5 cm-diameter disks (i.e.  
170 replicates) per combination of temperature and moisture treatments. Thus, each  
171 temperature-specific ARA analysis was composed of a total of 16 samples with two levels  
172 of moisture, eight saturated and eight unsaturated, plus controls with acetylene, ethylene  
173 and air. The BSC disks were weighed (for further water content analysis) and placed in  
174 350 mL glass jars with rubber septa in the lids (Figure S1c). These jars were then placed  
175 in an environmental chamber (Termaks series 8000, Bergen, Norway) at fixed  
176 temperature and light conditions. We acclimated the samples to each combination of  
177 temperature and light for 24 h. We then manually aerated the jars for a few seconds,  
178 closed the jars tightly and replaced 10% of the headspace with acetylene (except in jars  
179 used as ethylene and air controls). We incubated the jars at the set temperature and light  
180 conditions for 24 h. Then, we collected 22 mL of gas from each jar and analyzed it using  
181 a Clarus 400 gas chromatograph (PerkinElmer Ltd., Beaconsfield, UK) equipped with an  
182 automatic split/splitless injector and a flame ionization detector (FID), and an Elite-  
183 Alumina column (30 m, 0.53 mm; PerkinElmer Ltd., Beaconsfield, UK).



184           At the end of each 48 h acclimation-incubation period, we manually aerated the  
185 samples and started a new acclimation-incubation at a different light (but same  
186 temperature) condition. To control for a possible cumulative effect between light levels,  
187 we switched the order of the light levels for each temperature treatment i.e. half of the  
188 times starting with low light, and the other half starting with bright light.

189

#### 190           **2.4. Cyanobacteria and liverwort cover on BSC**

191           We estimated the cover of cyanobacteria and liverwort (*Anthelia juratzkana*; Figure  
192 S1b) on the BSC surface by epifluorescence microscopy (Figure S3). After ARA  
193 measurements, BSC samples were stored in a dark room at 5 °C for 1 to 4 days. Plant  
194 and cyanobacterial growth was assumed to be minimal under these conditions. From  
195 each 5 cm diameter BSC disk (Figure S1c), we subsampled a 1.5 cm diameter BSC disk  
196 and imaged the plant (liverwort) chlorophyll using a Leica DM6000B fluorescent  
197 microscope (Leica, Heerbrugg Switzerland) equipped with an I3 filter cube (Ex 450/90, Di  
198 510, Em 515), and the cyanobacterial phycocyanin with a TX2 filter cube (Ex 560/40, Di  
199 595, Em 630/30). Multiple fields of view were measured using both filter cubes and  
200 stitched together to form an image of 1x1 cm of BCS surface (Figure S3) using the Leica  
201 software. Images were analyzed in ImageJ/Fiji (Collins, 2007; Schindelin et al., 2012),  
202 and estimates of cyanobacterial and plant covers calculated as percentage of BSC  
203 surface cover.

204           We did not subsample BSC disks between light levels, but rather used samples  
205 that were exposed to low light for 48 h (24 h acclimation plus 24 h ARA) and then to high

206 light for another 48 h, or vice versa. Therefore, the treatments in this part of our analysis  
207 include temperature and moisture, but not light.

208

## 209 **2.5. Chlorophyll a**

210 We estimated Chl a content as an indicator of net photosynthetic rate in BSC (Yan-  
211 Gui et al., 2011). Similar to our BSC cover analysis, we subsampled a 1.5 cm diameter  
212 BSC disk from each 5 cm diameter BSC disk (Figure S1c) used for ARA analysis. We  
213 dried subsamples at 60 °C for 24 h, extracted Chl a using DMSO (65 °C, 90 min) and  
214 then estimated Chl a content by spectrophotometry (665 and 750 nm; Genesys 20,  
215 Thermo Scientific, Waltham, MA), as in Caesar et al. (2018):

216

$$217 \quad \text{Chl } a \text{ } \mu\text{g} = (11.9035 \times (A_{665} - A_{750})) \times S \quad (1)$$

$$218 \quad \text{Chl } a \text{ [mg} \times \text{m}^{-2}] = \text{Chl } a \text{ [}\mu\text{g]} / (\text{AR} \times 1000) \quad (2)$$

219

220 Where S is volume of solvent, AR is area (in m<sup>2</sup>) and A<sub>665</sub> and A<sub>750</sub> are  
221 absorbances at 665 and 750 nm, respectively.

222 As for BSC cover, treatments in this part of our analysis included temperature and  
223 moisture, but not light.

224

## 225 **2.6. DNA extraction and analysis**

226 Immediately after the fluorescence microscopy measurements (section 2.4), we  
227 dried (60 °C, 24 h) and ground (1 min, Mini bead beater 16; Biospec products) the 1.5  
228 BSC disks used for the cyanobacteria/liverwort cover analysis and stored them at -80 °C

229 for up to four months for DNA extraction. We pooled together replicates in pairs,  
230 combining them in equal weight parts (125 mg each for a total of 250 mg). We used the  
231 PowerSoil® DNA extraction kit (MOBIO/Qiagen), and shotgun sequencing approaches  
232 and analyses via the alignment-free fast taxonomic annotation tool Kraken2 (Wood and  
233 Langmead, 2019) with the Kraken2 Refseq Standard plus protozoa and fungi database  
234 and the web-based pipeline Kaiju (Menzel et al., 2016). We estimated relative abundance  
235 of microbial groups using Kraken2 and fungal:bacteria ratios based on Kaiju taxonomic  
236 assignments (see sections below). After quality filtering the raw reads using Trim Galore  
237 microbial metagenome functional profiling was performed using HUMAnN 3 (Beghiji et  
238 al., 2021). For the functional annotation, UniRef50 (Suzek et al., 2015), KEGG (Kanehisa  
239 and Goto, 2000), and BioCyc databases (Karp et al., 2019) were used. As for BSC cover  
240 and Chl *a*, treatments for this part of our analysis included temperature and moisture but  
241 not light. We characterized microbial communities only at two temperature levels: 10 and  
242 20 °C, which showed significant differences in N fixation and cyanobacterial cover (see  
243 Results).

244

## 245 **2.7. Fungal:bacterial ratios**

246 Fungi and bacteria decompose organic matter at different rates, which affects the  
247 N and C biogeochemistry of substrates like BSC. To study potential effects of the  
248 environment on the biogeochemistry of BSC via differential effects on fungi and bacteria,  
249 we estimated fungal:bacterial ratios. We calculated fungal:bacterial ratios based on  
250 numbers of gene copies assigned to each group by Kaiju.

251

## 252           **2.8. Microbial community and statistical analyses**

253           Microbial community analyses were performed using the *microeco* package in R  
254 (version 3.5.0). We first investigated the most important Orders for classifying samples  
255 into different treatments using a random forest approach. We then conducted an ANOVA  
256 test followed by a Tukey's HSD test,  $\alpha < 0.05$ , as well as Pearson correlations and  
257 PERMANOVA analyses between the Bray–Curtis dissimilarity score and moisture  
258 content. Finally, we conducted a Distance-based redundancy analysis (dbRDA) to assess  
259 the effects of the abiotic treatments on the top most abundant bacterial orders. To identify  
260 distinctive molecular pathways between treatments, we performed a linear discriminant  
261 analysis (LDA) effect size (LEfSe) analysis as implemented in the *microeco* package,  
262 then we selected the functions with a LDA score  $\geq 3.5$ .

263           We used a mixed model (*lmer* function in R, version 3.6.1) to analyze the fixed  
264 effects of environmental manipulations on N fixation, while accounting for the random  
265 effect of measurements on the same sample at two light levels. For the other response  
266 variables, which varied in response to temperature and moisture but not light, we used  
267 fixed models (*lm* function in R, version 3.6.1). We compared models based on the  
268 Bayesian Information Criterion (BIC; Figure S4).

269

270

## 271           **3. Results**

272

### 273           **3.1. Nitrogen fixation potential**

274 N fixation (using acetylene to ethylene conversion as a proxy) in BSC increased  
275 with light, temperature and moisture (Figure 1). Responses to environmental  
276 manipulations were better explained by the direct and additive effects of light, temperature  
277 and moisture than by their interactions (FigS4a). The minimum N fixation (ca. 0.5 nmol  
278  $\text{cm}^{-2} \text{h}^{-1}$ ) occurred in the BSC at low temperatures, regardless of moisture and light  
279 intensity, whereas the maximum ( $4.4 \pm 0.5 \text{ nmol cm}^{-2} \text{ h}^{-1}$ ) occurred in moisture saturated  
280 BSC at 25 °C and high light intensity (Figure 1).

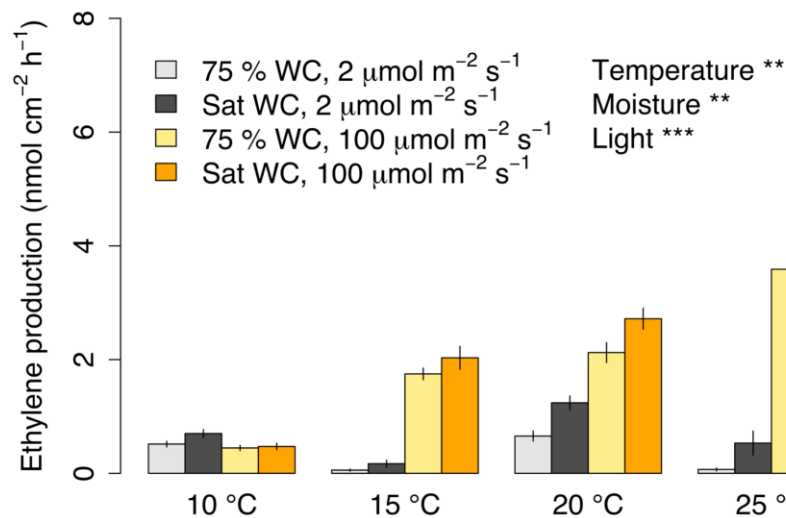

281  
282 **Figure 1.** Ethylene production in response to temperature, moisture (light and dark  
283 tones), and light intensity (grey and yellow colors). Significance codes (here and  
284 elsewhere):  $P < 0.001$  '\*\*\*\*',  $P < 0.01$  '\*\*\*'. Significance levels shown in the legend are from  
285 the statistical model with the lowest BIC in Figure S4a. Values are means  $\pm$  se.  $n = 8$ .  
286 WC: Water content. Sat: Saturated.

287

### 288 3.2. Cyanobacteria and liverwort cover

289 Cyanobacterial cover on BSC increased with temperature ( $p < 0.05$ ) and was not  
290 affected by moisture (Figure 2). BSC incubated at 20 °C had ca. 5 to 30% more

291 cyanobacteria on the surface than BSC incubated at 10 °C. There was no difference in  
292 cyanobacterial cover between BSCs incubated at 20 and 25 °C Liverwort cover was not  
293 affected by temperature or moisture (Figure 2). Temperature alone was a better predictor  
294 of cyanobacterial cover than moisture, or temperature and moisture combined (Figure  
295 S4).

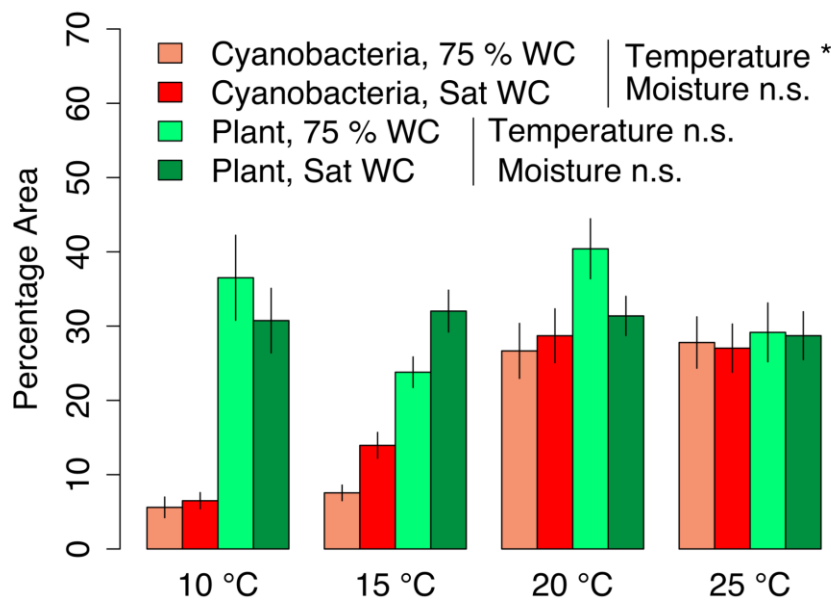

296

297 **Figure 2.** Cover of cyanobacteria and liverwort after 96 hours incubation under different  
298 conditions. WC: water content (%). Significance codes (here and elsewhere):  $P < 0.05$   
299 '\*'. Values are means  $\pm$  se.  $n = 8$ . WC: Water content. Sat: Saturated.

300

### 301 3.3. N fixation and cyanobacterial cover

302 Increases in N fixation rates were correlated ( $p < 0.05$ ) to cyanobacterial cover  
303 (Figure 3). Both cyanobacterial cover and N fixation rates increased with temperature  
304 between 10 and 20 °C. Between 20 and 25 °C N fixation rates continued increasing

305 (Figure 1) but cyanobacterial cover did not change (Figure 2). Chl a did not vary with  
306 environmental treatments (Figure S5) and was not related to N fixation rates (Figure S6).

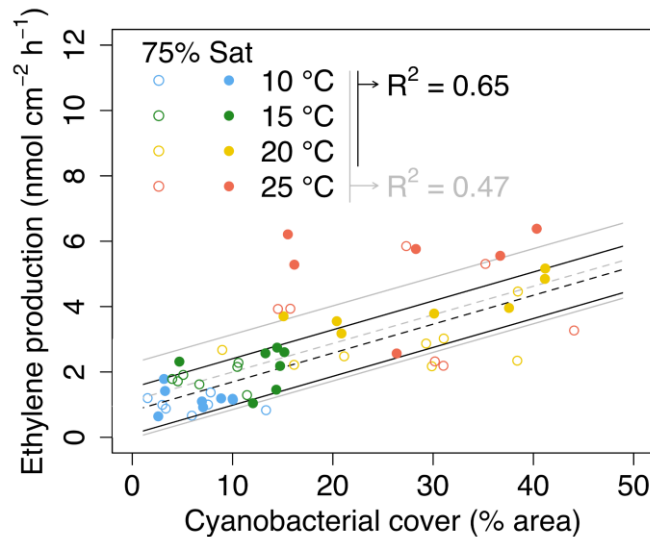

307

308 **Figure 3.** Correlation between cyanobacterial cover and N fixation rates across different  
309 temperature, moisture and light levels in a subarctic BSC. Dashed lines show the mean  
310 regression line, and solid lines the standard deviation of the mean. Grey lines and text  
311 show correlation between cyanobacterial cover and ethylene production for all  
312 temperature treatments ( $y_i = 1.12 + 0.09 \cdot x_i + \epsilon$ ;  $\epsilon \sim N(0, 1.16^2)$ , where  $\epsilon$ , here and  
313 elsewhere, is the error term describing the random component of the linear relationship).  
314 Black lines and text, show results excluding the 25 °C level ( $y_i = 0.81 + 0.09 \cdot x_i + \epsilon$ ;  
315  $\epsilon \sim N(0, 0.74^2)$ )—to illustrate the strong correlation between cyanobacterial cover and  
316 ethylene production between 10 and 20 °C.  $P < 0.05$  \*\*, with and without including the 25  
317 °C level. (n=8). Sat: Saturated (water content).

318

### 319 3.4. Relative abundance of cyanobacteria

320 Of the 20 most abundant Orders in the BSC microbial community, six had the  
321 highest importance score given by the random forest classification algorithm (Figures 4a

322 and b and S7). Alphaproteobacteria belonging to the Burkholderiales and  
323 Sphingomonadales, as well as Actinobacteria from Corynebacteriales were more  
324 abundant at 20 °C than 10 °C; Burkholderiales and Sphingomonadales being more  
325 abundant at 20 °C with saturated water content (Figures 4a and b). Cyanobacteria from  
326 the Nostocales are overall more abundant at 10 °C than 20 °C. Actinobacteria from  
327 Pseudonocardiales and Planctomycetes from Isosphaerales are more abundant at 75%  
328 water content than in saturated BSC. Pearson correlations and PERMANOVA analyses  
329 between the Bray–Curtis dissimilarity score and moisture content showed a significant  
330 effect of moisture on the microbial community structure (Figure 4b, Table S1). Moisture  
331 had a significant effect on the  $\alpha$ -diversity, based on the observed richness and Chao1  
332 index of microbial taxa at the phylotype level (Figure 4c, Table S2 and S3). Significant  
333 differences in Chao1 were observed between 75% and saturated BSC at 10 °C and at



334 20 °C, with overall higher richness observed in saturated BSC than 75% (Figure 4c).

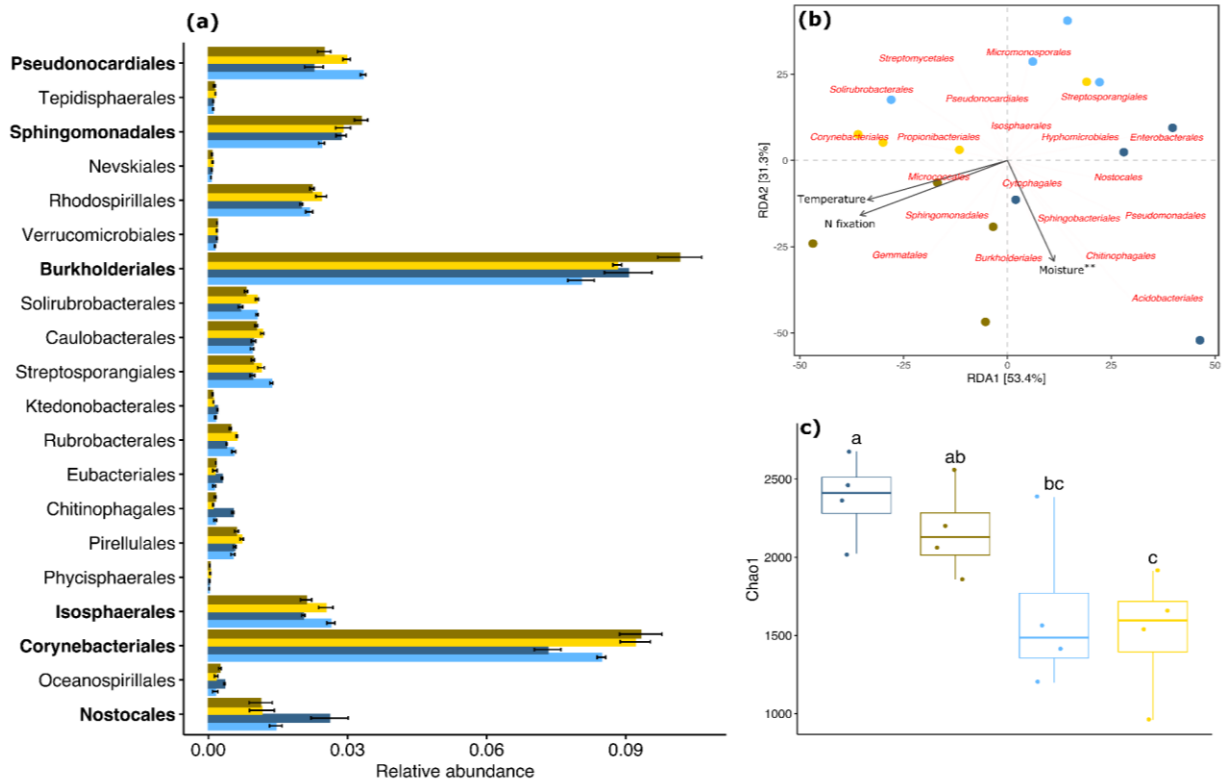

335

336 **Figure 4.** Microbial community composition and richness in a subarctic BSC under

337 different temperature and moisture treatments. Blue and yellow indicate 10 and 20 °C,

338 and light and dark tones indicate 70 and 100% moisture content, respectively. a) Relative

339 read abundances of the 20 most important Orders in our study system, identified by

340 Random Forest classification (see Figure S7). Taxa belonging to the 20 most abundant

341 Orders in the BSC are highlighted in bold. b) dbRDA ordination plots of the community-

342 treatment relationships of microbial communities. The top 20 most abundant Orders are

343 shown in red. The stars ( $r=0.30$ ,  $P < 0.01$ ) represent significant Pearson correlations

344 between the Bray–Curtis dissimilarity score and moisture content using mantel test. c)

345 The  $\alpha$ -diversity Chao1 richness index across treatments. Different letters above data

346 points indicate statistically significant differences ( $P < 0.05$ ).

347

348 Fungal:bacterial ratios were slightly affected by a combination of warming and  
349 wetting (Figure S8). Total gene numbers indicate that bacteria grew faster than fungi in  
350 the saturated BSC at 20 °C, resulting in a decrease in fungal:bacterial ratios (Figure  
351 S7). Total DNA did not change significantly across environmental treatments ( $P>0.05$ ),  
352 but it tended to increase with moisture, especially under warming (Figure S8).

353

### 354 **3.5 BSC microbial functions.**

355 The LEfSe results show the effect size of the top 15 differentially abundant MetaCyc  
356 metabolic pathways between temperature (Figure 5a) and moisture (Figure 5b). At 10  
357 °C, pathways linked to autotrophy and anaerobic respiration such as nucleoside and  
358 nucleotide biosynthesis/degradation, cofactors, carrier and vitamin biosynthesis,  
359 glycolysis and photosynthesis were significantly enriched. At 20 °C, central metabolism  
360 pathways associated with cellular respiration and fermentation were more abundant  
361 such as the pentose phosphate pathway, TCA cycle and electron transport chain.  
362 Pathways associated with fermentation and TCA cycle were found enriched at 75%  
363 water content compared to saturated water content which was characterized by an  
364 enrichment in cellular respiration related pathways as well as carbohydrate, vitamin,  
365 nucleotide, fatty acid and lipid biosynthesis.

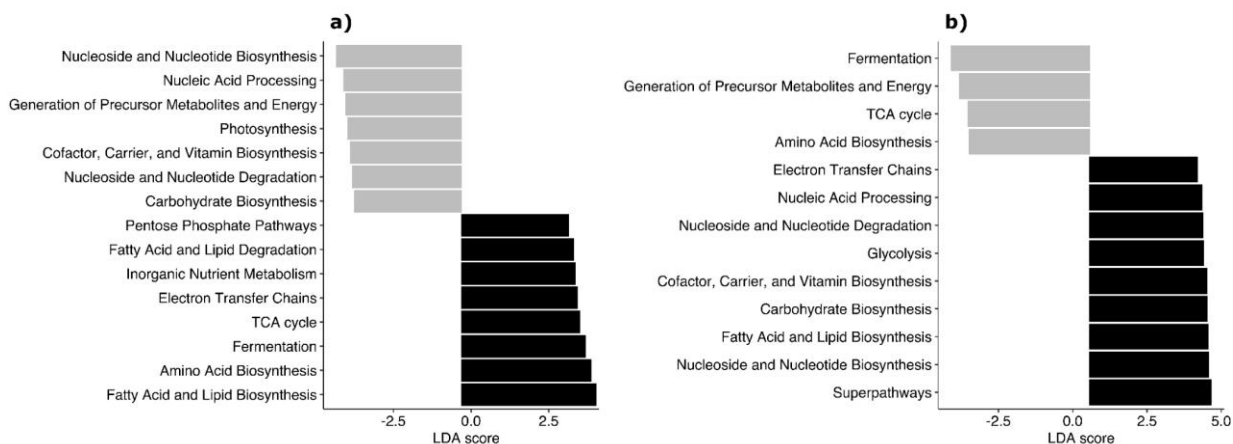

366

367

368 **Figure 5.** Top 15 MetaCyc pathways to be differentially abundant at a) temperature (10  
369 °C in grey vs 20 °C in black) and b) moisture (70% in grey vs 100% in black). LDA scores  
370 were calculated using LefSe analysis.

371

#### 372 4. Discussion

373 Climate-driven shifts in the cover, abundance, composition and activity of BSC  
374 have the potential to alter the biogeochemistry of terrestrial ecosystems (Elbert et al.,  
375 2012; Porada et al., 2014; Weber et al., 2015; Ferrenberg et al., 2017). In hot drylands,  
376 warming alone may have little or no effect on the bacterial communities of BSC, wetting  
377 alone can increase cyanobacterial abundance, and wetting and warming combined can  
378 decrease it (Steven et al., 2015). This shows how bacterial communities from dryland  
379 BSC can buffer moderate levels of warming to some extent, but that when combined with  
380 altered precipitation the effects of warming can be noticeable (Steven et al., 2015). In our  
381 experiment with a BSC adapted to cold and mesic conditions, wetting did not have an  
382 effect on the surface cover (a proxy for abundance) of cyanobacteria, and warming  
383 increased it. This suggests that the growth of cyanobacteria in our system may be more

384 limited by low temperatures than by lack of moisture. Alternatively, this may reflect the  
385 wider range of temperature than moisture levels in our experimental design. Mean annual  
386 temperature and precipitation are projected to increase in the high north in the coming  
387 decades (IPCC, 2021). If the Icelandic BSC used in this study is representative of BSC  
388 from cold and mesic climates in other high latitudes, our results suggest that the  
389 abundance of cyanobacteria in this type of BSC could be affected more by warming than  
390 by increased precipitation.

391         The time-scales at which BSC responds to the environment varies with stages of  
392 ecological succession (Pushkareva et al., 2017). In the Arctic, temperature and light  
393 intensity can more rapidly affect N fixation rates in less-developed BSC dominated by  
394 cyanobacteria than in more-developed BSC with dense lichen covers (Pushkareva et al.,  
395 2017). The BSC used in this study has the signatures of an early successional stage,  
396 including abundant cyanobacteria, being virtually free of lichen patches, having  
397 fungal:bacterial ratios closer to those found in deserts than in the tundra (Fierer et al.,  
398 2009), and having a mean Chl *a* content closer to those reported for cyanobacterial soil  
399 crust than for lichen crusts (Wu et al., 2017). Ecosystems dominated by BSC similar to  
400 the one used in this study could be particularly sensitive to climate change.

401         Our correlation analysis suggests that the positive relationship between  
402 cyanobacterial cover and N fixation in our study system is in part related to net abundance  
403 of cyanobacteria on the soil surface, and in part to the level of their metabolic activity.  
404 Between 10 and 20 °C, warming increased both cyanobacterial cover and N fixation,  
405 suggesting that the increase in N fixation within this temperature range may have been  
406 caused by an increase in the number of heterocysts — the N fixing cells of cyanobacteria.

407 If total DNA is assumed to be an indicator of microbial biomass (Semenov et al., 2018;  
408 but see Leckie et al., 2004), the previous interpretation is challenged by the lack of  
409 difference in total DNA between environmental treatments. However, it is plausible that  
410 warming caused a growth of cyanobacteria and a reduction of other microbial groups,  
411 resulting in no change in total DNA. A comparison of long-term climatic experiments in  
412 drylands in the USA, for example, showed that wetting BSC increased the abundance of  
413 cyanobacteria while reducing the abundance of other photosynthetic organisms (Steven  
414 et al., 2015).

415         Alternatively, warming may have altered the microbial composition of the BSC  
416 profile, which varies with depth (Maire et al., 2014). Many cyanobacteria commonly found  
417 in BSC such as *Microcoleus vaginatus* are motile (Campbell, 1980), and can use this  
418 motility to reach out for light (Biddanda et al., 2015; Schuergers et al., 2016). In a  
419 laboratory experiment with cultured *Oscillatoria*-like cyanobacteria, warming increased  
420 the speed at which cells moved towards light ( $\sim 50 \mu\text{m min}^{-1}$  at  $10^\circ\text{C}$  and  $\sim 215 \mu\text{m min}^{-1}$   
421 at  $35^\circ\text{C}$ ; Biddanda et al., 2015). An increase in cyanobacterial cover with no change in  
422 total DNA could have been caused by a temperature-accelerated migration of  
423 cyanobacteria to the BSC surface, where there is more light. There, they could have fixed  
424 more N than in deeper and darker BSC layers. Overall, our results suggest that between  
425  $10$  and  $20^\circ\text{C}$ , increases in N fixation rates in our cold- and mesic-adapted BSC were  
426 caused by increases in cyanobacterial abundance, migration of cyanobacteria to the BSC  
427 surface, or a combination of both.

428         Between  $20$  and  $25^\circ\text{C}$ , we observed an increase in N fixation rates with no increase  
429 in cyanobacterial cover, suggesting that it may have been caused by changes in the

430 metabolic activity of the N fixers. In a semi-arid *Pinus halepensis* plantation, warming did  
431 not affect the ratios between major microbial groups in lichen and moss crusts, but it did  
432 affect the level of physiological stress of the Gram negative bacterial community, as  
433 indicated by phospholipid fatty acid ratios (Maestre et al., 2015). Similarly, in soil from a  
434 temperate forest, short-term pulses of microbial respiration were caused by metabolic  
435 activation of dormant microbes, with no changes in total microbial biomass (Salazar-  
436 Villegas et al., 2016). Our observations suggest that under certain conditions the  
437 environment can affect N fixation rates in BSC by altering the metabolic rates of major N  
438 fixers, like cyanobacteria, even if there are no changes in their net abundance.

439        Much of the research on the effects of climate change on ecosystem function  
440 focuses on temperature and moisture (Zelikova et al., 2012; Hu et al., 2014; Salazar-  
441 Villegas et al., 2016; Rousk et al., 2018). The comparatively lower number of studies that  
442 have included light intensity have found, as in our own study, clear interactions between  
443 light, temperature and moisture on the cycling of elements through BSC (Lange et al.,  
444 1998; Grote et al., 2010). Interestingly, we did not find a relationship between N fixation  
445 rates and Chl *a*, as hypothesized. At the short temporal scale of our experiment, the  
446 effects of light on C fixation may be more dependent on the activity than on the abundance  
447 of photosynthetic cells and pigments. Because of the great dependence of N fixation on  
448 photosynthetically fixed C, the projected decreases in downward solar radiation in the  
449 high north by 2100 (as much as  $-10 \text{ W m}^{-2}$  relative to the reference period of 1986-2005,  
450 under the RCP4.5 scenario; KNMI, 2021), could reduce N fixation rates in cold-adapted  
451 BSC.

452           The ways in which BSC interacts with the environment largely depends on its  
453 community composition (Belnap, 2002a; Bowker et al., 2021). On one hand, the rates at  
454 which BSC assimilates C and N depend on the abundance, type and activity of species  
455 in the system. BSC dominated by *Collema* soil lichens, for example, has higher levels of  
456 nitrogenase activity and therefore can fix more N than BSC dominated by *Microcoleus*  
457 *vaginatus* (Belnap, 2002a). On the other hand, the capacity of a BSC to resist  
458 environmental change depends on its community composition (Bowker et al., 2021). The  
459 presence of the lichens *Enchylium* and *Peltula* can increase the capacity of BSC to resist  
460 stress caused by wetting pulses at supra-optimal temperatures (Bowker et al., 2021).

461           It is well known that warming and moisture can induce significant compositional  
462 change in the bacterial communities of biocrust (Garcia-Pichel et al., 2013; Steven et al.,  
463 2015; Delgado-Baquerizo et al., 2018), with associated effects on bacterial functions  
464 (Steven et al., 2015). This can happen, for example, by environmental change  
465 differentially altering the growth rate and survival of different taxonomic groups (Lürling et  
466 al., 2013). Our results support the idea that warming can exert a selective pressure on  
467 warm-adapted microbial groups over those adapted to colder regimes (Muñoz-Martín et  
468 al., 2018). Moreover, our findings show that this selective pressure can manifest within a  
469 few days after environmental change. This was observed in our metagenomic  
470 investigations where photosynthesis-related genes are enriched at 10 °C but not at 20  
471 °C, which corresponds to a decreased relative abundance of Nostocales. In addition,  
472 pathways related to a heterotrophic lifestyle are enriched at higher temperature and  
473 moisture, which correspond to a shift in the community composition with  
474 Alphaproteobacteria (e.g., Burkholderiales and Sphingomonadales) becoming more

475 dominant in those conditions. In a broader sense, this suggests that climate change could  
476 lead to a replacement of the photosynthetic and N fixing Nostocales by non-  
477 photosynthetic N fixing bacteria. Such alteration could affect photosynthetic activity  
478 supported by cold adapted biocrust, and thus C cycling, as well as N cycling. A deeper  
479 understanding of the contribution of microbial community composition to Nfixation activity  
480 appears to be critical to predicting the productivity of cold biocrusts.

481         Short-term ecosystem responses to the environment may not necessarily reflect  
482 long-term trends (Alatalo et al., 2015). More multi-year, in situ experiments are needed at  
483 high latitudes (e.g. Rousk et al., 2018; Salazar et al., in progress) to better understand  
484 the effects of climate change on cold- and mesic-adapted BSC over large spatial and  
485 temporal scales. However, our short-term laboratory experiment 1) highlights direct and  
486 interacting effects of environmental factors on BSC composition and functioning, which  
487 could be useful to inform the structure and/or parameterization of ecosystem models that  
488 explicitly take into account the inherent dynamics of BSC (Rodríguez-Caballero et al.,  
489 2015); 2) provides data that can help with BSC characterization (Pietrasiak et al., 2013),  
490 which could further serve as reference when assessing the impacts of human  
491 disturbances on BSC (Szyja et al., 2018) and/or with the design and implementation of  
492 BSC-based restoration practices on degraded land (Bowker, 2007; Velasco-Ayuso et al.,  
493 2017; Tucker et al., 2020); and 3) contributes to the understanding of pulses of BSC  
494 activity in response to short-term climatic anomalies such as increasingly frequent and  
495 intense heat waves.

496

497



## 498 **Acknowledgments**

499 Most AS work, including data collection and analysis, was done when working as a  
500 postdoc at University of Iceland, under the Icelandic Research Fund 2016 grant number  
501 163336. AS finished his contributions to this article as an Assistant Professor at the  
502 Faculty of Environmental and Forests Sciences, Agricultural University of Iceland.

503

504

## 505 **7. References**

506

507 Aguilar, A. J., Huber-Sannwald, E., Belnap, J., Smart, D. R., & Moreno, J. A.  
508 (2009). Biological soil crusts exhibit a dynamic response to seasonal rain and release  
509 from grazing with implications for soil stability. *Journal of Arid Environments*, 73(12),  
510 1158-1169.

511 Alatalo, J. M., Jägerbrand, A. K., & Molau, U. (2015). Testing reliability of short-  
512 term responses to predict longer-term responses of bryophytes and lichens to  
513 environmental change. *Ecological Indicators*, 58, 77-85.

514 Beghini, F., McIver, L. J., Blanco-Míguez, A., Dubois, L., Asnicar, F., Maharjan, S.,  
515 ... & Segata, N. (2021). Integrating taxonomic, functional, and strain-level profiling of  
516 diverse microbial communities with bioBakery 3. *Elife*, 10, e65088.

517 Belnap, J. (2001). Factors influencing nitrogen fixation and nitrogen release in  
518 biological soil crusts. In *Biological soil crusts: structure, function, and management* (pp.  
519 241-261). Springer, Berlin, Heidelberg.

520 Belnap, J. (2002a). Nitrogen fixation in biological soil crusts from southeast Utah,  
521 USA. *Biology and fertility of soils*, 35(2), 128-135.

522 Belnap, J. (2002b). Impacts of off-road vehicles on nitrogen cycles in biological soil  
523 crusts: resistance in different US deserts. *Journal of Arid Environments*, 52(2), 155-165.

524 Belnap, J. (2003). The world at your feet: desert biological soil crusts. *Frontiers in*  
525 *Ecology and the Environment*, 1(4), 181-189.

526 Biddanda, B. A., McMillan, A. C., Long, S. A., Snider, M. J., & Weinke, A. D. (2015).  
527 Seeking sunlight: rapid phototactic motility of filamentous mat-forming cyanobacteria  
528 optimize photosynthesis and enhance carbon burial in Lake Huron's submerged  
529 sinkholes. *Frontiers in Microbiology*, 6, 930.

530 Blay, E. S., Schwabedissen, S. G., Magnuson, T. S., Aho, K. A., Sheridan, P. P.,  
531 & Lohse, K. A. (2017). Variation in biological soil crust bacterial abundance and diversity  
532 as a function of climate in cold steppe ecosystems in the Intermountain West, USA.  
533 *Microbial ecology*, 74(3), 691-700.

534 Borchhardt, N., Baum, C., Thiem, D., Köpcke, T., Karsten, U., Leinweber, P., &  
535 Hryniewicz, K. (2019). Soil microbial phosphorus turnover and identity of algae and fungi  
536 in biological soil crusts along a transect in a glacier foreland. *European Journal of Soil*  
537 *Biology*, 91, 9-17.

538 Bowker, M. A. (2007). Biological soil crust rehabilitation in theory and practice: an  
539 underexploited opportunity. *Restoration Ecology*, 15(1), 13-23.

540 Bowker, M. A., Maestre, F. T., Eldridge, D., Belnap, J., Castillo-Monroy, A.,  
541 Escolar, C., & Soliveres, S. (2014). Biological soil crusts (biocrusts) as a model system in

542 community, landscape and ecosystem ecology. *Biodiversity and Conservation*, 23(7),  
543 1619-1637.

544 Bowker, M. A., Miller, M. E., Belnap, J., Sisk, T. D., & Johnson, N. C. (2008).  
545 Prioritizing conservation effort through the use of biological soil crusts as ecosystem  
546 function indicators in an arid region. *Conservation Biology*, 22(6), 1533-1543.

547 Bowker, M. A., Reed, S. C., Maestre, F. T., & Eldridge, D. J. (2018). Biocrusts: the  
548 living skin of the earth.

549 Bowker, M. A., Rengifo- Faiffer, M. C., Antoninka, A. J., Grover, H. S., Coe, K. K.,  
550 Fisher, K., ... & Stark, L. R. (2021). Community composition influences ecosystem  
551 resistance and production more than species richness or intraspecific diversity. *Oikos*.

552 Breen, K., & Lévesque, E. (2008). The influence of biological soil crusts on soil  
553 characteristics along a High Arctic glacier foreland, Nunavut, Canada. *Arctic, Antarctic,  
554 and Alpine Research*, 40(2), 287-297.

555 Büdel, B., Darienko, T., Deutschewitz, K., Dojani, S., Friedl, T., Mohr, K. I., ... &  
556 Weber, B. (2009). Southern African biological soil crusts are ubiquitous and highly diverse  
557 in drylands, being restricted by rainfall frequency. *Microbial ecology*, 57(2), 229-247.

558 Caesar, J., Tamm, A., Ruckteschler, N., Leifke, A. L., & Weber, B. (2018).  
559 Revisiting chlorophyll extraction methods in biological soil crusts—methodology for  
560 determination of chlorophyll a and chlorophyll a+ b as compared to previous methods.  
561 *Biogeosciences*, 15(5), 1415-1424.

562 Campbell, S. (1980). Soil stabilization by a prokaryotic desert crust: implications  
563 for Precambrian land biota. In *Limits of life* (pp. 85-98). Springer, Dordrecht.

564 Colesie, C., Green, T. A., Haferkamp, I., & Buedel, B. (2014). Habitat stress  
565 initiates changes in composition, CO<sub>2</sub> gas exchange and C-allocation as life traits in  
566 biological soil crusts. *The ISME journal*, 8(10), 2104-2115.

567 Collins, T. J. (2007). ImageJ for microscopy. *Biotechniques*, 43(S1), S25-S30.

568 Delgado-Baquerizo, M., Maestre, F. T., & Gallardo, A. (2013). Biological soil crusts  
569 increase the resistance of soil nitrogen dynamics to changes in temperatures in a semi-  
570 arid ecosystem. *Plant and soil*, 366(1-2), 35-47.

571 Delgado- Baquerizo, M., Maestre, F. T., Eldridge, D. J., Bowker, M. A., Jeffries, T.  
572 C., & Singh, B. K. (2018). Biocrust- forming mosses mitigate the impact of aridity on soil  
573 microbial communities in drylands: observational evidence from three continents. *New*  
574 *Phytologist*, 220(3), 824-835.

575 Dickson, L. G. (2000). Constraints to nitrogen fixation by cryptogamic crusts in a  
576 polar desert ecosystem, Devon Island, NWT, Canada. *Arctic, Antarctic, and Alpine*  
577 *Research*, 32(1), 40-45.

578 Elbert, W., Weber, B., Burrows, S., Steinkamp, J., Büdel, B., Andreae, M. O., &  
579 Pöschl, U. (2012). Contribution of cryptogamic covers to the global cycles of carbon and  
580 nitrogen. *Nature Geoscience*, 5(7), 459.

581 Eldridge, D. J., Freudenberger, D., & Koen, T. B. (2006). Diversity and abundance  
582 of biological soil crust taxa in relation to fine and coarse-scale disturbances in a grassy  
583 eucalypt woodland in eastern Australia. *Plant and Soil*, 281(1), 255-268.

584 Ferrenberg, S., Reed, S. C., & Belnap, J. (2015). Climate change and physical  
585 disturbance cause similar community shifts in biological soil crusts. *Proceedings of the*  
586 *National Academy of Sciences*, 112(39), 12116-12121.

587 Ferrenberg, S., Tucker, C. L., & Reed, S. C. (2017). Biological soil crusts:  
588 diminutive communities of potential global importance. *Frontiers in Ecology and the*  
589 *Environment*, 15(3), 160-167.

590 Gao, L., Bowker, M. A., Xu, M., Sun, H., Tuo, D., & Zhao, Y. (2017). Biological soil  
591 crusts decrease erodibility by modifying inherent soil properties on the Loess Plateau,  
592 China. *Soil Biology and Biochemistry*, 105, 49-58.

593 Garcia-Pichel, F., Loza, V., Marusenko, Y., Mateo, P., & Potrafka, R. M. (2013).  
594 Temperature drives the continental-scale distribution of key microbes in topsoil  
595 communities. *Science*, 340(6140), 1574-1577.

596 Godínez- Alvarez, H., Morín, C., & Rivera- Aguilar, V. (2012). Germination,  
597 survival and growth of three vascular plants on biological soil crusts from a Mexican  
598 tropical desert. *Plant Biology*, 14(1), 157-162.

599 Grote, E. E., Belnap, J., Housman, D. C., & Sparks, J. P. (2010). Carbon exchange  
600 in biological soil crust communities under differential temperatures and soil water  
601 contents: implications for global change. *Global Change Biology*, 16(10), 2763-2774.

602 Guo, J., Cole, J. R., Zhang, Q., Brown, C. T., & Tiedje, J. M. (2015). Microbial  
603 community analysis with ribosomal gene fragments from shotgun metagenomes. *Applied*  
604 *and environmental microbiology*, AEM-02772.

605 Hardy, R. W., Holsten, R. D., Jackson, E. K., & Burns, R. C. (1968). The acetylene-  
606 ethylene assay for N<sub>2</sub> fixation: laboratory and field evaluation. *Plant physiology*, 43(8),  
607 1185-1207.

608 Hu, R., Wang, X. P., Pan, Y. X., Zhang, Y. F., & Zhang, H. (2014). The response  
609 mechanisms of soil N mineralization under biological soil crusts to temperature and  
610 moisture in temperate desert regions. *European journal of soil biology*, 62, 66-73.

611 IPCC, 2021: Climate Change 2021: The Physical Science Basis. Contribution of  
612 Working Group I to the Sixth Assessment Report of the Intergovernmental Panel on  
613 Climate Change [Masson-Delmotte, V., P. Zhai, A. Pirani, S. L. Connors, C. Péan, S.  
614 Berger, N. Caud, Y. Chen, L. Goldfarb, M. I. Gomis, M. Huang, K. Leitzell, E. Lonnoy, J.  
615 B. R. Matthews, T. K. Maycock, T. Waterfield, O. Yelekçi, R. Yu & B. Zhou (eds.)].  
616 Cambridge University Press. In Press.

617 Jónsdóttir, I. S., Magnússon, B., Gudmundsson, J., Elmarsdóttir, Á., & Hjartarson,  
618 H. (2005). Variable sensitivity of plant communities in Iceland to experimental warming.  
619 *Global Change Biology*, 11(4), 553-563.

620 Kanehisa, M., & Goto, S. (2000). KEGG: kyoto encyclopedia of genes and  
621 genomes. *Nucleic acids research*, 28(1), 27-30.

622 Karp, P. D., Billington, R., Caspi, R., Fulcher, C. A., Latendresse, M., Kothari, A.,  
623 ... & Subhraveti, P. (2019). The BioCyc collection of microbial genomes and metabolic  
624 pathways. *Briefings in bioinformatics*, 20(4), 1085-1093.

625 KNMI, 2021. KNMI Climate Change Atlas. Retrieved on October 11, 2021, from  
626 [https://climexp.knmi.nl/plot\\_atlas\\_form.py](https://climexp.knmi.nl/plot_atlas_form.py).

627 Leckie, S. E., Prescott, C. E., Grayston, S. J., Neufeld, J. D., & Mohn, W. W.  
628 (2004). Comparison of chloroform fumigation-extraction, phospholipid fatty acid, and DNA  
629 methods to determine microbial biomass in forest humus. *Soil Biology and Biochemistry*,  
630 36(3), 529-532.

631 Lange, O. L., Belnap, J., & Reichenberger, H. (1998). Photosynthesis of the  
632 cyanobacterial soil- crust lichen *Collema tenax* from arid lands in southern Utah, USA:  
633 Role of water content on light and temperature responses of CO<sub>2</sub> exchange. *Functional*  
634 *Ecology*, 12(2), 195-202.

635 Maestre, F. T., Bowker, M. A., Eldridge, D. J., Cortina, J., Lázaro, R., Gallardo, A.,  
636 ... & Valencia, E. (2016). Biological soil crusts as a model system in ecology. In *Biological*  
637 *Soil Crusts: An Organizing Principle in Drylands* (pp. 407-425). Springer, Cham.

638 Menzel, P., Ng, K. L., & Krogh, A. (2016). Fast and sensitive taxonomic  
639 classification for metagenomics with Kaiju. *Nature communications*, 7, 11257.

640 Perkins, S. E., Alexander, L. V., & Nairn, J. R. (2012). Increasing frequency,  
641 intensity and duration of observed global heatwaves and warm spells. *Geophysical*  
642 *Research Letters*, 39(20).

643 Pietrasiak, N., Regus, J. U., Johansen, J. R., Lam, D., Sachs, J. L., & Santiago, L.  
644 S. (2013). Biological soil crust community types differ in key ecological functions. *Soil*  
645 *Biology and Biochemistry*, 65, 168-171.

646 Porada, P., Weber, B., Elbert, W., Pöschl, U., & Kleidon, A. (2014). Estimating  
647 impacts of lichens and bryophytes on global biogeochemical cycles. *Global*  
648 *Biogeochemical Cycles*, 28(2), 71-85.

649 Pushkareva, E., Johansen, J. R., & Elster, J. (2016). A review of the ecology,  
650 ecophysiology and biodiversity of microalgae in Arctic soil crusts. *Polar Biology*, 39(12),  
651 2227-2240.

652 Pushkareva, E., Kvéderová, J., Šimek, M., & Elster, J. (2017). Nitrogen fixation and  
653 diurnal changes of photosynthetic activity in Arctic soil crusts at different development  
654 stage. *European Journal of Soil Biology*, 79, 21-30.

655 Pushkareva, E., Baumann, K., Van, A. T., Mikhailyuk, T., Baum, C., Hrynkiewicz,  
656 K., ... & Leinweber, P. (2021). Diversity of microbial phototrophs and heterotrophs in  
657 Icelandic biocrusts and their role in phosphorus-rich Andosols. *Geoderma*, 386, 114905.

658 Rodríguez-Caballero, E., Cantón, Y., & Jetten, V. (2015). Biological soil crust  
659 effects must be included to accurately model infiltration and erosion in drylands: An  
660 example from Tabernas Badlands. *Geomorphology*, 241, 331-342.

661 Rodríguez-Caballero, E., Belnap, J., Büdel, B., Crutzen, P. J., Andreae, M. O.,  
662 Pöschl, U., & Weber, B. (2018). Dryland photoautotrophic soil surface communities  
663 endangered by global change. *Nature Geoscience*, 11(3), 185.

664 Rousk, K., Sorensen, P. L., & Michelsen, A. (2018). What drives biological  
665 nitrogen fixation in high arctic tundra: Moisture or temperature?. *Ecosphere*, 9(2),  
666 e02117.

667 Salazar-Villegas, A., Blagodatskaya, E., & Dukes, J. S. (2016). Changes in the  
668 size of the active microbial pool explain short-term soil respiratory responses to  
669 temperature and moisture. *Frontiers in microbiology*, 7, 524.

670 Scherer, S., Almon, H., & Böger, P. (1988). Interaction of photosynthesis,  
671 respiration and nitrogen fixation in cyanobacteria. *Photosynthesis research*, 15(2), 95-  
672 114.



673 Schindelin, J., Arganda-Carreras, I., Frise, E., Kaynig, V., Longair, M., Pietzsch,  
674 T., ... & Tinevez, J. Y. (2012). Fiji: an open-source platform for biological-image analysis.  
675 Nature methods, 9(7), 676.

676 Schuergers, N., Lenn, T., Kampmann, R., Meissner, M. V., Esteves, T.,  
677 Temerinac-Ott, M., ... & Wilde, A. (2016). Cyanobacteria use micro-optics to sense light  
678 direction. Elife, 5, e12620.

679 Semenov, M., Blagodatskaya, E., Stepanov, A., & Kuzyakov, Y. (2018). DNA-  
680 based determination of soil microbial biomass in alkaline and carbonaceous soils of semi-  
681 arid climate. Journal of Arid Environments, 150, 54-61.

682 Stewart, K. J., Lamb, E. G., Coxson, D. S., & Siciliano, S. D. (2011). Bryophyte-  
683 cyanobacterial associations as a key factor in N<sub>2</sub>-fixation across the Canadian Arctic.  
684 Plant and Soil, 344(1), 335-346.

685 Steven, B., Gallegos- Graves, L. V., Yeager, C. M., Belnap, J., Evans, R. D., &  
686 Kuske, C. R. (2012). Dryland biological soil crust cyanobacteria show unexpected  
687 decreases in abundance under long- term elevated CO<sub>2</sub>. Environmental microbiology,  
688 14(12), 3247-3258.

689 Steven, B., Lionard, M., Kuske, C. R., & Vincent, W. F. (2013). High bacterial  
690 diversity of biological soil crusts in water tracks over permafrost in the high arctic polar  
691 desert. PLoS One, 8(8), e71489.

692 Steven, B., Kuske, C. R., Gallegos-Graves, L. V., Reed, S. C., & Belnap, J. (2015).  
693 Climate change and physical disturbance manipulations result in distinct biological soil  
694 crust communities. Applied and environmental microbiology, 81(21), 7448-7459.

695           Suzek, B. E., Wang, Y., Huang, H., McGarvey, P. B., Wu, C. H., & UniProt  
696 Consortium. (2015). UniRef clusters: a comprehensive and scalable alternative for  
697 improving sequence similarity searches. *Bioinformatics*, 31(6), 926-932.

698           Tucker, C., Antoninka, A., Day, N., Poff, B., & Reed, S. (2020). Biological soil crust  
699 salvage for dryland restoration: An opportunity for natural resource restoration.  
700 *Restoration ecology*, 28, S9-S16.

701           Williams, L., Borchhardt, N., Colesie, C., Baum, C., Komsic-Buchmann, K., Rippin,  
702 M., ... & Büdel, B. (2017). Biological soil crusts of Arctic Svalbard and of Livingston Island,  
703 Antarctica. *Polar Biology*, 40(2), 399-411.

704           Wood, D. E., Lu, J., & Langmead, B. (2019). Improved metagenomic analysis with  
705 Kraken 2. *Genome biology*, 20(1), 1-13.

706           Yan-Gui, S., Xin- Rong, L., Ying- Wu, C., Zhi- Shan, Z., & Yan, L. (2011). Carbon  
707 fixation of cyanobacterial–algal crusts after desert fixation and its implication to soil  
708 organic carbon accumulation in desert. *Land Degradation & Development*, 24(4), 342-  
709 349.

710           Yoshitake, S., Uchida, M., Iimura, Y., Ohtsuka, T., & Nakatsubo, T. (2018). Soil  
711 microbial succession along a chronosequence on a High Arctic glacier foreland, Ny-  
712 Ålesund, Svalbard: 10 years' change. *Polar Science*, 16, 59-67.

713           Zelikova, T. J., Housman, D. C., Grote, E. E., Neher, D. A., & Belnap, J. (2012).  
714 Warming and increased precipitation frequency on the Colorado Plateau: implications for  
715 biological soil crusts and soil processes. *Plant and Soil*, 355(1-2), 265-282.

716 Zhao, L., Liu, Y., Wang, Z., Yuan, S., Qi, J., Zhang, W., ... & Li, X. (2020). Bacteria  
717 and fungi differentially contribute to carbon and nitrogen cycles during biological soil crust  
718 succession in arid ecosystems. *Plant and Soil*, 447(1), 379-392.
